# Supplementary material for: Marked changes in diversity and relative activity of picoeukaryotes with depth in the global ocean
Source: bioRxiv or medRxiv preprint supplement (doi:10.1101/552604), 2019-02-18
Supplement: Supplementary file [file media-1.pdf]

## SUPPLEMENTARY FIGURES

**Figure S1.** World map showing the location of the Malaspina stations sampled for this study. Orange dots represent stations containing Oxygen Minimum Zone (OMZ) samples.

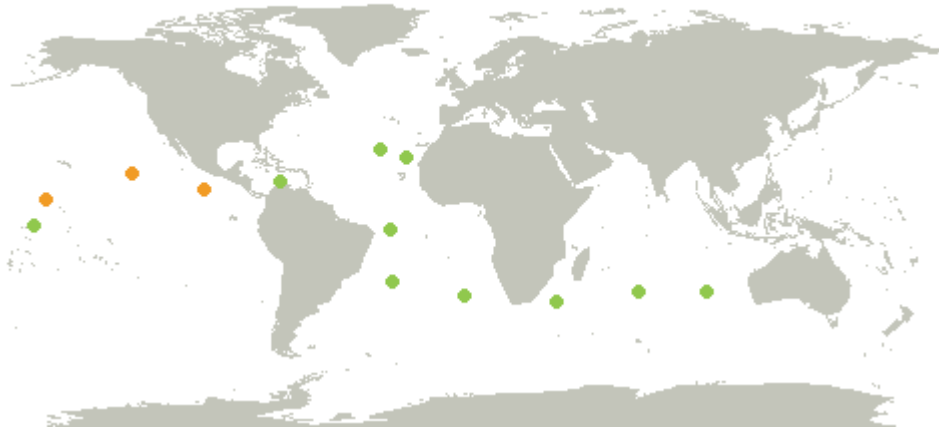

**Figure S2.** Richness of picoeukaryotic communities in samples from different water layers of each ocean basin using the rRNA (upper boxplots) and rDNA (lower boxplots) datasets.

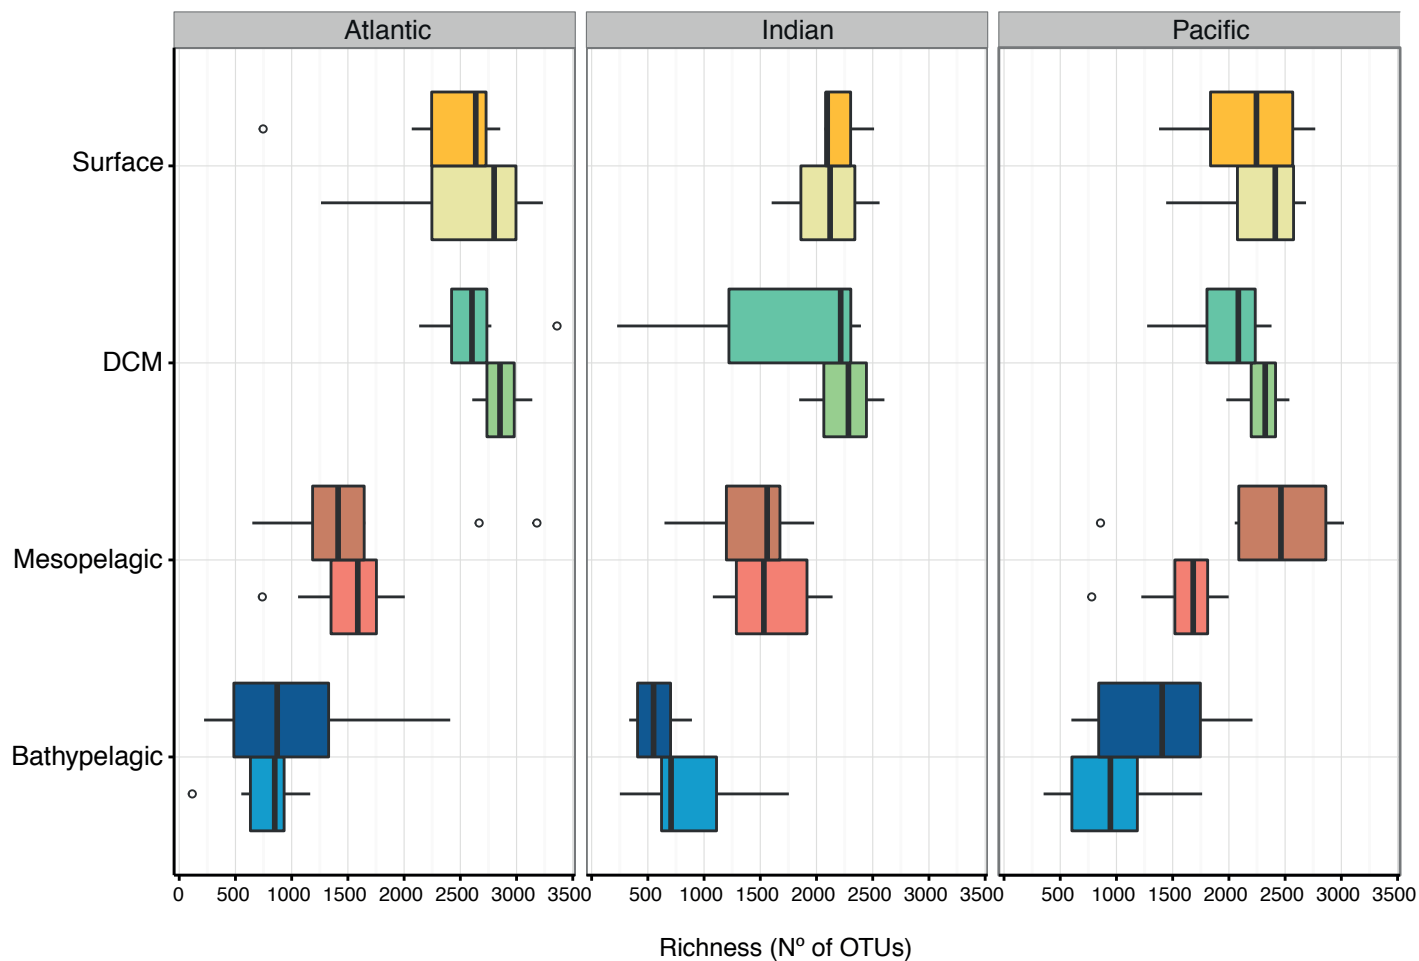

**Figure S3.** Clustering of all picoeukaryotic samples in a non-metric multidimensional scaling (NMDS) plot. Each sample is colored according to the depth layer and has different symbol shape according to the type of dataset (rDNA or rRNA).

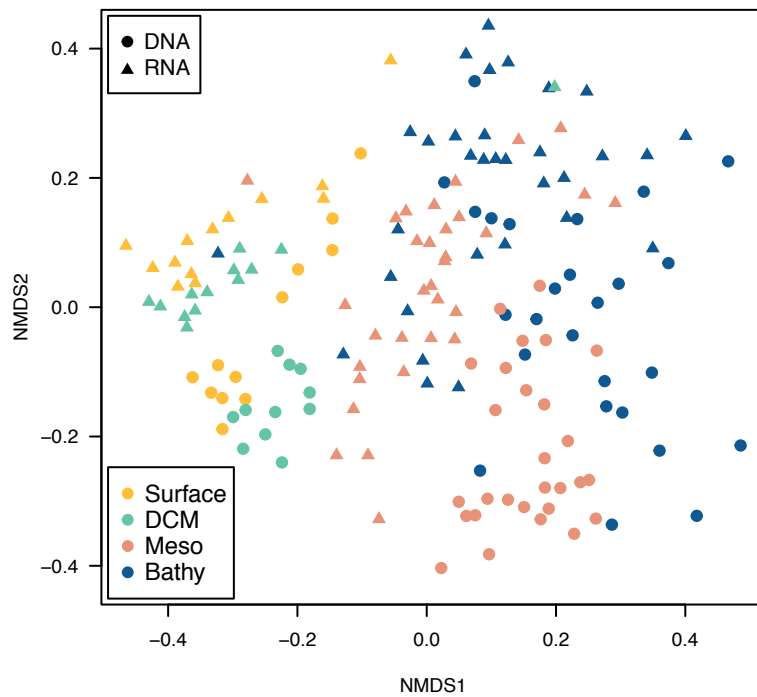

**Figure S4.** Main environmental variables and inorganic nutrient concentrations in the four layers of the water column (actual values as black dots and averaged values as brown lines).

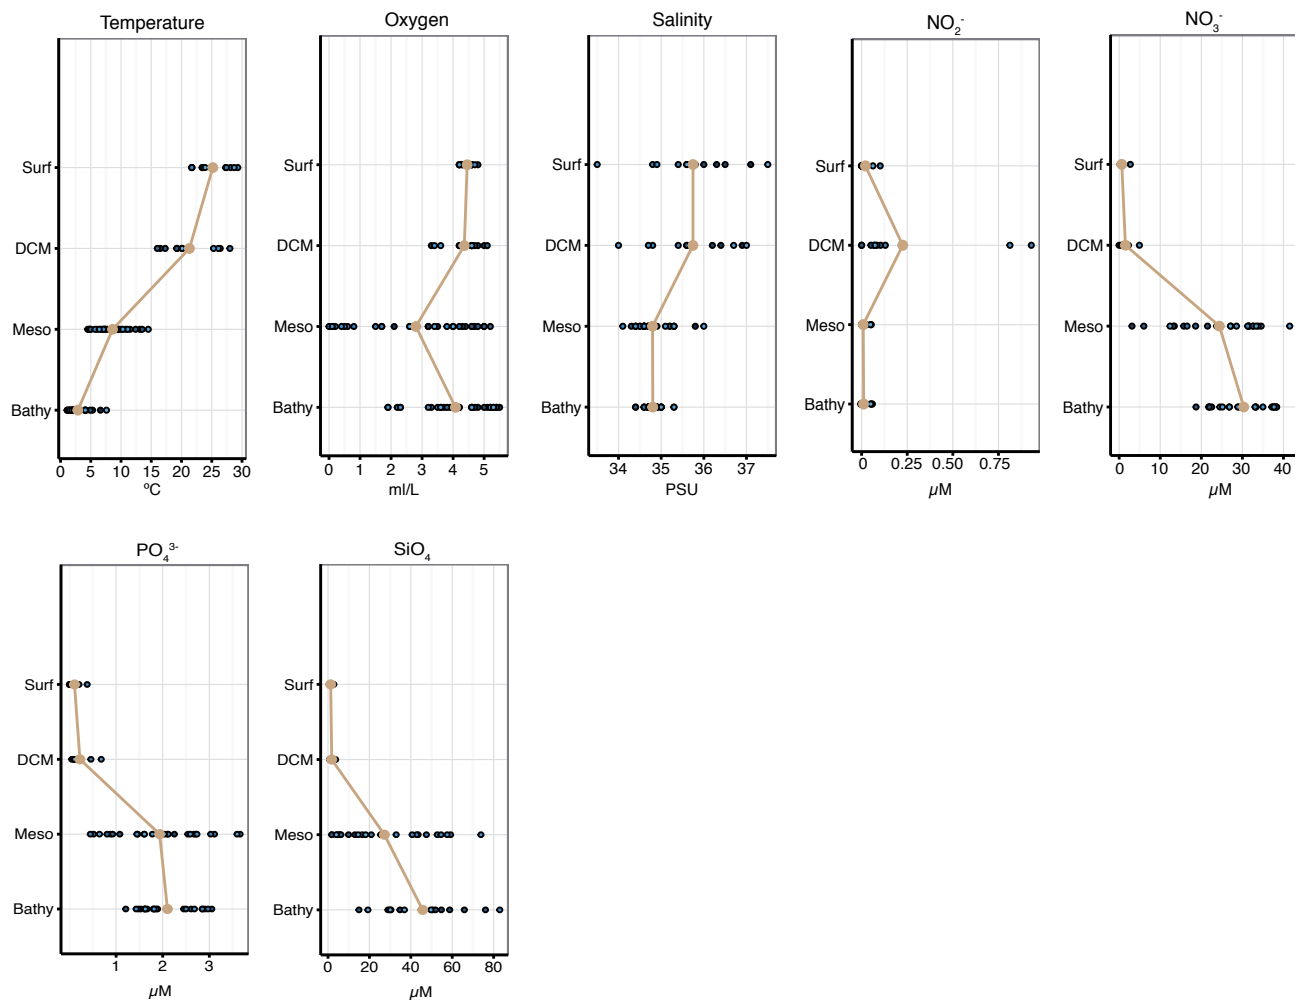

**Figure S5.** Representation of all phylogenetic groups based in the total abundance in the rRNA and rDNA surveys.

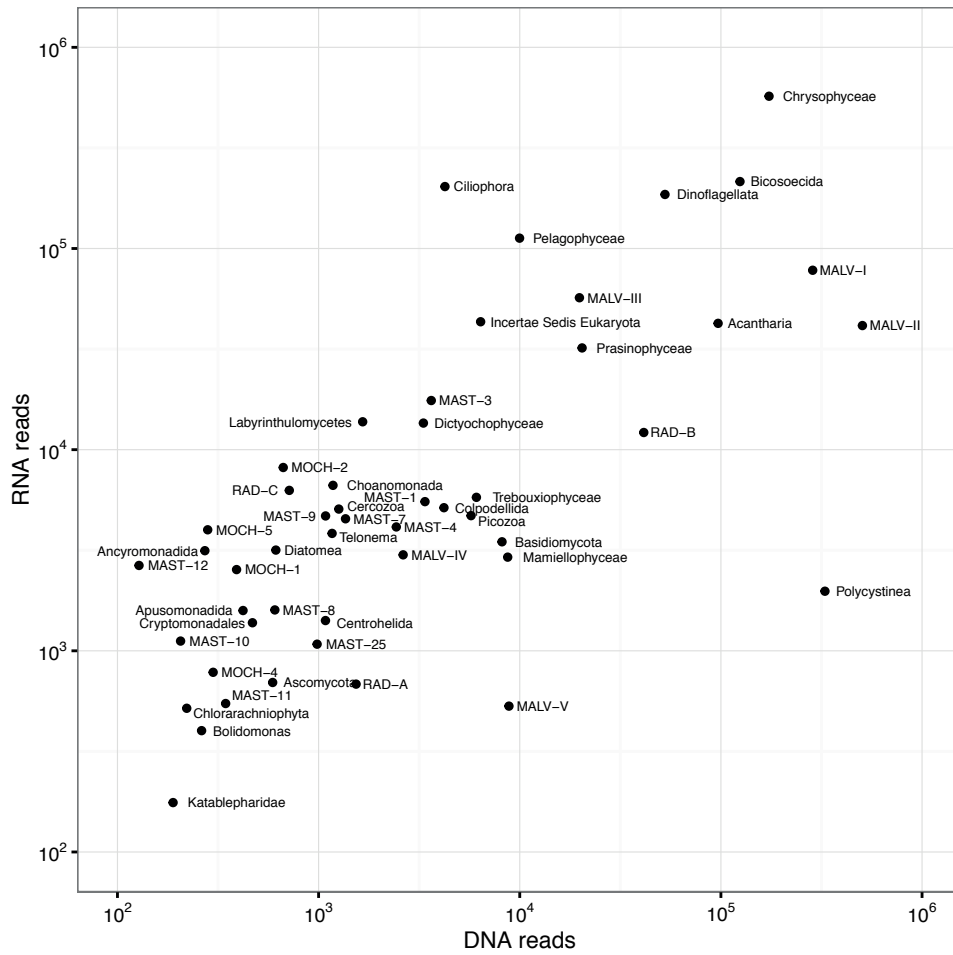

**Figure S6.** Distribution of the rRNA:rDNA ratios for all OTUs within a given depth layer. The red line indicates a ratio of 1.

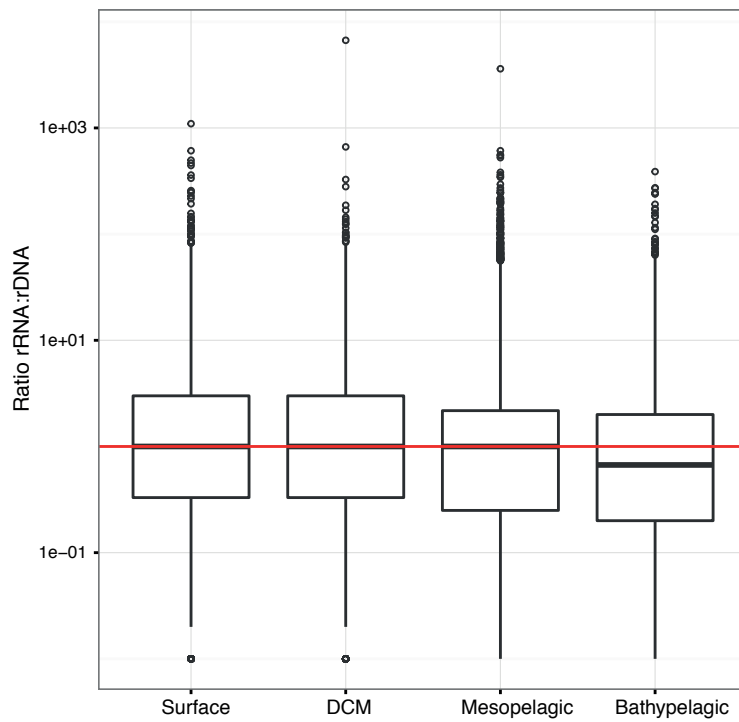

**Figure S7.** Clustering of all picoeukaryotic samples on a Non-metric multidimensional analysis (NMDS) based on Bray-Curtis dissimilarities differentiating between DSL (a, c) and OMZ (b, d) samples. Each sample is colored according the specific depth layer.

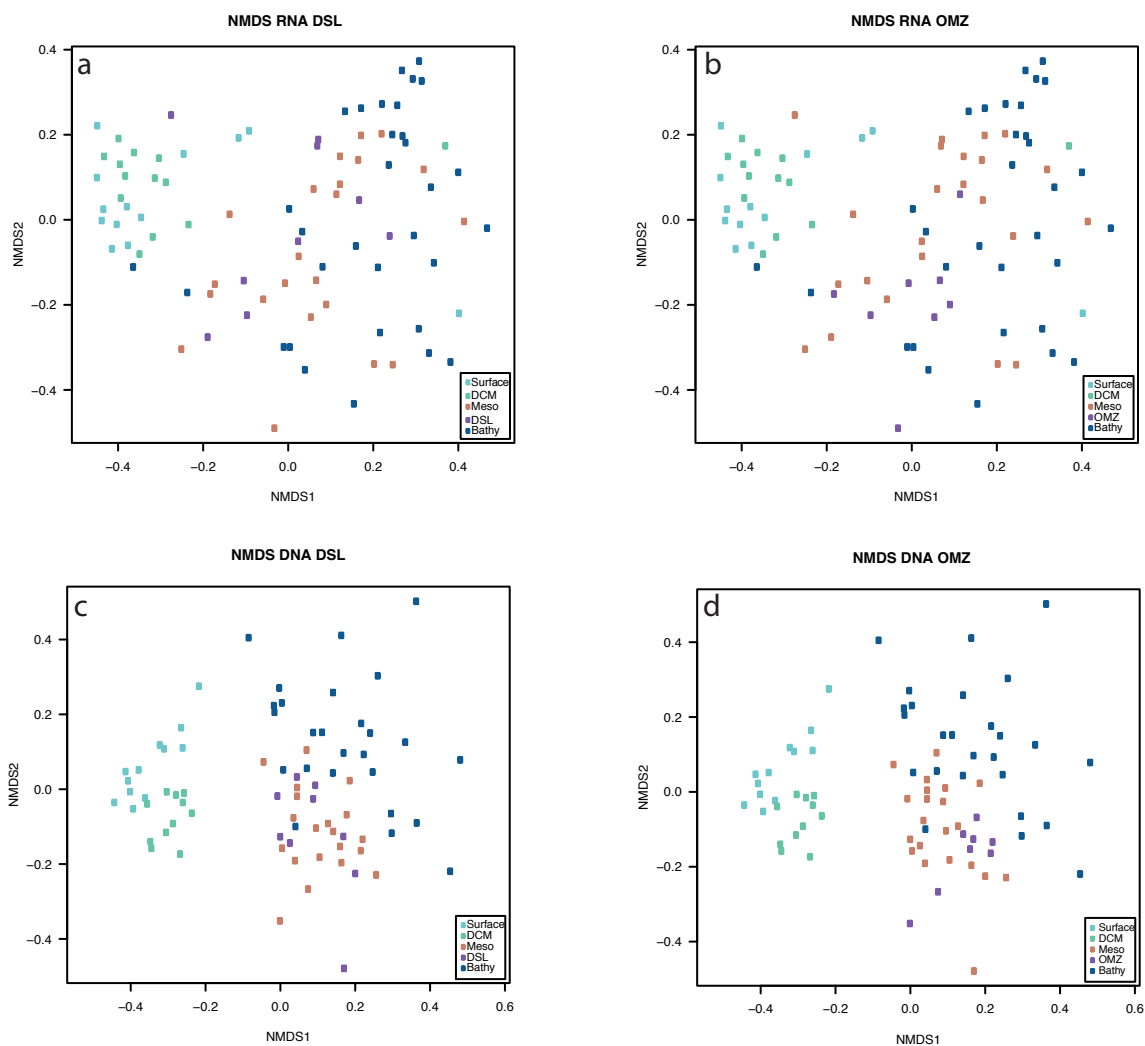

**Figure S8.** Richness in the different water layers defined as DSL (a) and OMZ (b).  
rRNA (upper boxplots) and rDNA (lower boxplots).

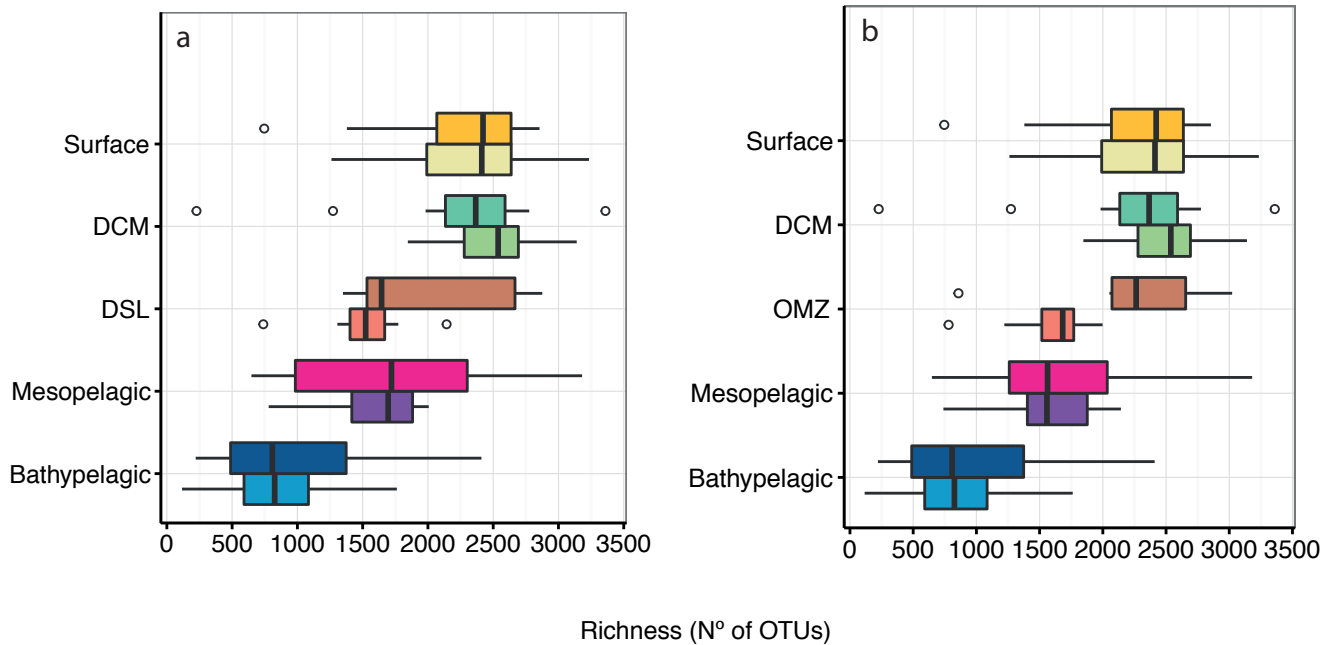



## **SUPPLEMENTARY TABLES**

**Table S1.** Results of the PERMANOVA analysis for the rDNA and rRNA datasets. For each dataset whole water column, and only epipelagic and deep-ocean depths had been analyzed.

|                                    | DNA                |         |                               |         |                                       |         |
|------------------------------------|--------------------|---------|-------------------------------|---------|---------------------------------------|---------|
|                                    | Whole Water column |         | Surface + DCM<br>(Epipelagic) |         | Meso + bathypelagic<br>(Deep – Ocean) |         |
|                                    | R2                 | p-value | R2                            | p-value | R2                                    | p-value |
| <b>Light</b><br>(presence/absence) | 0.14               | 0.001   | -                             | -       | -                                     | -       |
| <b>Temperature</b>                 | 0.04               | 0.001   | 0.11                          | 0.002   | 0.08                                  | 0.001   |
| <b>Salinity</b>                    | 0.01               | 0.139   | 0.06                          | 0.082   | 0.03                                  | 0.021   |
| <b>Water Mass</b>                  | -                  | -       | -                             | -       | <b>0.24</b>                           | 0.045   |
| <b>O<sub>2</sub></b>               | 0.04               | 0.001   | 0.07                          | 0.014   | 0.06                                  | 0.001   |
| <b>Ocean</b>                       | 0.05               | 0.001   | 0.12                          | 0.039   | 0.08                                  | 0.001   |
| <b>Depth</b>                       | 0.07               | 0.001   | 0.09                          | 0.001   | 0.01                                  | 0.783   |
| <b>NO<sub>3</sub></b>              | 0.01               | 0.511   | 0.04                          | 0.374   | 0.02                                  | 0.275   |
| <b>PO<sub>4</sub></b>              | 0.02               | 0.042   | 0.04                          | 0.740   | 0.02                                  | 0.105   |
| <b>SiO<sub>4</sub></b>             | 0.01               | 0.445   | 0.04                          | 0.704   | 0.02                                  | 0.386   |
| <b>DAPI</b>                        | 0.01               | 0.122   | 0.05                          | 0.268   | 0.01                                  | 0.864   |
| <b>Conductivity</b>                | 0.02               | 0.017   | 0.04                          | 0.495   | 0.03                                  | 0.017   |

|                                    | RNA                |         |                               |         |                                       |         |
|------------------------------------|--------------------|---------|-------------------------------|---------|---------------------------------------|---------|
|                                    | Whole Water column |         | Surface + DCM<br>(Epipelagic) |         | Meso + bathypelagic<br>(Deep – Ocean) |         |
|                                    | R2                 | p-value | R2                            | p-value | R2                                    | p-value |
| <b>Light</b><br>(presence/absence) | 0.15               | 0.001   | -                             | -       | -                                     | -       |
| <b>Temperature</b>                 | 0.03               | 0.001   | 0.08                          | 0.045   | 0.05                                  | 0.001   |
| <b>Salinity</b>                    | 0.02               | 0.017   | 0.09                          | 0.032   | 0.04                                  | 0.023   |
| <b>Water Mass</b>                  | -                  | -       | -                             | -       | <b>0.25</b>                           | 0.040   |
| <b>O<sub>2</sub></b>               | 0.06               | 0.001   | 0.04                          | 0.296   | 0.02                                  | 0.173   |
| <b>Ocean</b>                       | 0.06               | 0.001   | 0.13                          | 0.052   | 0.07                                  | 0.006   |
| <b>Depth</b>                       | 0.07               | 0.001   | 0.11                          | 0.004   |                                       |         |
| <b>NO<sub>3</sub></b>              | 0.01               | 0.227   | 0.03                          | 0.777   | 0.01                                  | 0.989   |
| <b>PO<sub>4</sub></b>              | 0.02               | 0.077   | 0.03                          | 0.563   | 0.02                                  | 0.260   |
| <b>SiO<sub>4</sub></b>             | 0.01               | 0.819   | 0.02                          | 0.872   | 0.01                                  | 0.506   |
| <b>DAPI</b>                        | 0.01               | 0.268   | 0.08                          | 0.038   | 0.02                                  | 0.317   |
| <b>Conductivity</b>                | 0.01               | 0.343   | 0.04                          | 0.438   | 0.02                                  | 0.320   |

**Table S1.** Number of total OTUs in each water layer and of the unique OTUs within them in the DNA and RNA dataset.

**DNA**

| <b>Depth</b> | <b>Total OTUs</b> | <b>N° of reads</b> | <b>OTUs unique</b> | <b>N° reads unique</b> | <b>%reads unique</b> |
|--------------|-------------------|--------------------|--------------------|------------------------|----------------------|
| Surface      | 5968              | 259,490            | 765                | 11,221                 | 4.3                  |
| DCM          | 6741              | 239,147            | 849                | 16,989                 | 7.1                  |
| Mesopelagic  | 8106              | 643,049            | 1652               | 47,084                 | 7.3                  |
| Bathypelagic | 6117              | 578,182            | 584                | 14,549                 | 2.5                  |

**RNA**

| <b>Depth</b> | <b>Total OTUs</b> | <b>N° of reads</b> | <b>OTUs unique</b> | <b>N° reads unique</b> | <b>%reads unique</b> |
|--------------|-------------------|--------------------|--------------------|------------------------|----------------------|
| Surface      | 6171              | 285,018            | 386                | 5,415                  | 1.9                  |
| DCM          | 6891              | 285,525            | 284                | 3,339                  | 1.2                  |
| Mesopelagic  | 9622              | 685,314            | 1221               | 22,967                 | 3.35                 |
| Bathypelagic | 8046              | 711,808            | 314                | 4,510                  | 0.6                  |
